# Supplementary material
Source: publisher site journal article supplement (https://www.dovepress.com/article/593458)
Supplement: Supplementary file 1 [file 593458_Supplementary%20Tables.docx]

Supplementary Table 1. ICD-10-CM and ICD-10-PCS Codes Used in the Study

This table lists all diagnosis and procedure codes used to define dialysis-requiring acute kidney injury (AKI-D), exclusion of pre-existing end-stage kidney disease (ESKD), chronic kidney disease (CKD) for sensitivity analyses, and related renal replacement therapy procedures. Codes are based on ICD-10-CM (diagnoses) and ICD-10-PCS (procedures) as used in the 2022 HCUP National Inpatient Sample.

**A. Acute Kidney Injury (AKI)**

**ICD-10-CM Diagnosis Codes**

- N17.0 – Acute kidney failure with tubular necrosis
- N17.1 – Acute kidney failure with acute cortical necrosis
- N17.2 – Acute kidney failure with medullary necrosis
- N17.8 – Other acute kidney failure
- N17.9 – Acute kidney failure, unspecified

**B. Dialysis Procedures (Acute Renal Replacement Therapy)**

**ICD-10-PCS Procedure Codes**

- 5A1D00Z – Performance of urinary filtration, intermittent (hemodialysis)
- 5A1D60Z – Performance of urinary filtration, continuous (continuous renal replacement therapy)
- 5A1D70Z – Performance of urinary filtration, other method

*Receipt of any of the above procedure codes during hospitalization in combination with an AKI diagnosis was used to define dialysis-requiring AKI (AKI-D).*

**C. Exclusion Criteria: Pre-existing End-Stage Kidney Disease (ESKD)**

**ICD-10-CM Diagnosis Codes**

- N18.6 – End stage renal disease
- Z99.2 – Dependence on renal dialysis

Hospitalizations with any of the above codes were excluded to ensure dialysis reflected acute rather than maintenance therapy.

**D. Chronic Kidney Disease (CKD) – Sensitivity Analyses**

**ICD-10-CM Diagnosis Codes**

- N18.1 – Chronic kidney disease, stage 1
- N18.2 – Chronic kidney disease, stage 2 (mild)
- N18.3 – Chronic kidney disease, stage 3 (moderate)
- N18.30 – Chronic kidney disease, stage 3 unspecified
- N18.31 – Chronic kidney disease, stage 3a
- N18.32 – Chronic kidney disease, stage 3b
- N18.4 – Chronic kidney disease, stage 4 (severe)
- N18.5 – Chronic kidney disease, stage 5

*Patients with CKD codes listed above were excluded in sensitivity analyses; N18.6 was excluded from this definition as ESKD was handled separately.*

**E. Renal Transplant Status (Exclusion / Covariate)**

**ICD-10-CM Diagnosis Codes**

- Z94.0 – Kidney transplant status
- T86.10 – Kidney transplant failure
- T86.11 – Kidney transplant rejection
- T86.12 – Kidney transplant infection

**F. Notes on Coding Strategy**

- Diagnosis and procedure codes were identified from all available diagnosis (DX1–DXn) and procedure (PR1–PRn) fields in the NIS.
- Code selection was based on established HCUP guidance and prior national studies of dialysis-requiring AKI.
- Discharge-based non-recovery was defined independently of diagnosis codes and was operationalized using discharge disposition variables, as described in the Methods.

Abbreviations: AKI, acute kidney injury; AKI-D, dialysis-requiring acute kidney injury; CKD, chronic kidney disease; ESKD, end-stage kidney disease; ICD-10-CM, International Classification of Diseases, Tenth Revision, Clinical Modification; ICD-10-PCS, International Classification of Diseases, Tenth Revision, Procedure Coding System; NIS, National Inpatient Sample.

Supplementary Table 2. Full multivariable model of dialysis dependence or non-recovery after AKI-D

| Variable | Adjusted OR (95% CI) |
| --- | --- |
| **Age** |  |
| Age 65–74 | 1.38 (1.30–1.48) |
| Age 75–84 | 1.77 (1.65–1.90) |
| Age 85+ | 2.19 (1.95–2.46) |
| Age <50 | 0.59 (0.55–0.63) |
| **Sex** |  |
| Female | 1.11 (1.06–1.17) |
| **Race / ethnicity** |  |
| Black | 0.87 (0.82–0.93) |
| Asian/Pacific Islander | 0.57 (0.50–0.65) |
| Hispanic | 0.66 (0.61–0.72) |
| Native American | 0.90 (0.71–1.14) |
| **Primary insurance** |  |
| Medicaid | 0.80 (0.74–0.87) |
| No charge | 0.26 (0.14–0.48) |
| Private | 0.82 (0.76–0.87) |
| Self-pay | 0.45 (0.38–0.54) |
| **Neighborhood income** |  |
| Income Q1 (Lowest) | 0.98 (0.90–1.06) |
| Income Q2 | 0.96 (0.89–1.03) |
| Income Q3 | 0.96 (0.89–1.04) |
| **APR-DRG severity** |  |
| Extreme | 2.31 (2.16–2.48) |
| Minor | 0.64 (0.23–1.74) |
| Moderate | 0.69 (0.61–0.79) |
| **APR-DRG mortality risk** |  |
| Extreme | 1.58 (1.47–1.69) |
| Minor | 0.48 (0.29–0.78) |
| Moderate | 0.54 (0.48–0.61) |
| **Hospital bed size** |  |
| Medium | 1.08 (1.01–1.15) |
| Small | 1.19 (1.10–1.29) |
| **Hospital region** |  |
| Midwest | 1.21 (1.12–1.31) |
| Northeast | 1.14 (1.05–1.25) |
| West | 0.90 (0.83–0.98) |
| **Hospital teaching status** |  |
| Rural | 1.04 (0.91–1.19) |
| Urban non-teaching | 1.19 (1.10–1.28) |
| Medicaid | 0.80 (0.74–0.87) |
| **Any missing category (race, payer, income, severity)** |  |
| Missing | 0.85 (0.47–1.54) |

Supplementary table 2 examines factors associated with dialysis dependence or non-recovery at discharge among survivors of dialysis-requiring acute kidney injury (AKI-D). Adjusted odds ratios (aORs) and 95% confidence intervals (CIs) are shown for all covariates included in the primary model. All covariates from the primary model are shown. Extreme estimates reflect sparse categories (e.g., missing or rare strata) and were retained for completeness but were not interpreted in the main text. Reference categories were age 50–64 years, male sex, White race, Medicare insurance, highest income quartile, APR-DRG major severity and mortality risk, large hospital bed size, urban teaching hospitals, and Southern region.

Supplementary Table 3. Sensitivity analyses of dialysis dependence or non-recovery at discharge

| Sensitivity scenario | Adjusted OR (95% CI) |
| --- | --- |
| Primary definition | 1.19 (1.10–1.28) |
| Broad discharge definition (including home health) | 1.22 (1.14–1.31) |
| Excluding patients with CKD (non-ESKD) | 1.17 (1.08–1.27) |

Supplementary table 3 examines the robustness of the association between hospital teaching status and dialysis dependence or non-recovery at discharge among survivors of dialysis-requiring acute kidney injury (AKI-D). Adjusted odds ratios (aORs) and 95% confidence intervals (CIs) were estimated using survey-weighted multivariable logistic regression models based on the HCUP National Inpatient Sample (NIS) 2022. The primary definition classified non-recovery as discharge to a non-home facility (excluding home health). The broad definition additionally classified discharge with home health services as non-recovery. Chronic kidney disease (CKD) was defined using ICD-10-CM N18 codes excluding N18.6. All models were adjusted for patient demographics, illness severity, and hospital characteristics.

Supplementary Table 4. Total hospitalization charges among AKI-D survivors

| Discharge status | Median total charges (IQR) |
| --- | --- |
| Dialysis-dependent / Non-recovery proxy | $202,198 ($105,631–$389,400) |
| Recovered enough for home | $114,503 ($62,942–$218,000) |

Supplementary table 4 shows the median total hospitalization charges among patients with dialysis-requiring acute kidney injury (AKI-D) who survived to hospital discharge, stratified by dialysis dependence at discharge. Values are weighted medians with interquartile ranges (IQR) using the HCUP National Inpatient Sample (NIS) 2022 survey design. Total charges reflect hospital charges reported in NIS and do not represent actual costs or reimbursements. Charges ≤0 were treated as missing prior to analysis. Dialysis dependence at discharge was defined as receipt of acute dialysis during hospitalization, survival to discharge, and discharge to a non-home setting. Patients with pre-existing end-stage kidney disease were excluded.
